# Supplementary material for: Nodes Having a Major Influence to Break Cooperation Define a Novel Centrality Measure: Game Centrality
Source: PLOS journal article supplement (doi:10.1371/journal.pone.0067159), 2013-06-28
Supplement: S1 (10.1371/journal.pone.0067159.s001) [file journal.pone.0067159.s001]

## Supporting Information (Text S1)

### Nodes having a major influence to break cooperation define a novel centrality measure: game centrality

Gabor I. Simko<sup>1,2</sup>, Peter Csermely<sup>1,\*</sup>

<sup>1</sup> Department of Medical Chemistry, Semmelweis University, Budapest, Hungary,

<sup>2</sup> Vanderbilt University, Nashville, TN USA

\*Corresponding author, E-mail: [csermely.peter@med.semmelweis-univ.hu](mailto:csermely.peter@med.semmelweis-univ.hu)

#### Summary

In this Supporting Information (Text S1) we give a detailed description of the NetworGame spatial social dilemma game simulation program package. Besides the pseudocode description of the NetworGame algorithm the Supporting Information also contains a supplementary figure, 2 supplementary tables as well as 11 references.

The computer programs of the NetworGame package with a User Guide can be downloaded from here: [www.linkgroup.hu/NetworGame.php](http://www.linkgroup.hu/NetworGame.php).

#### Table of Contents

|                                                      |          |
|------------------------------------------------------|----------|
| <b>Supplementary Figure S1</b> .....                 | <b>2</b> |
| <b>Supplementary Tables</b> .....                    | <b>3</b> |
| Table S1. List of consensus party hubs.....          | 3        |
| Table S2. List of consensus date hubs .....          | 4        |
| <b>Description of the NetworGame algorithm</b> ..... | <b>5</b> |
| <b>Supplementary References</b> .....                | <b>8</b> |

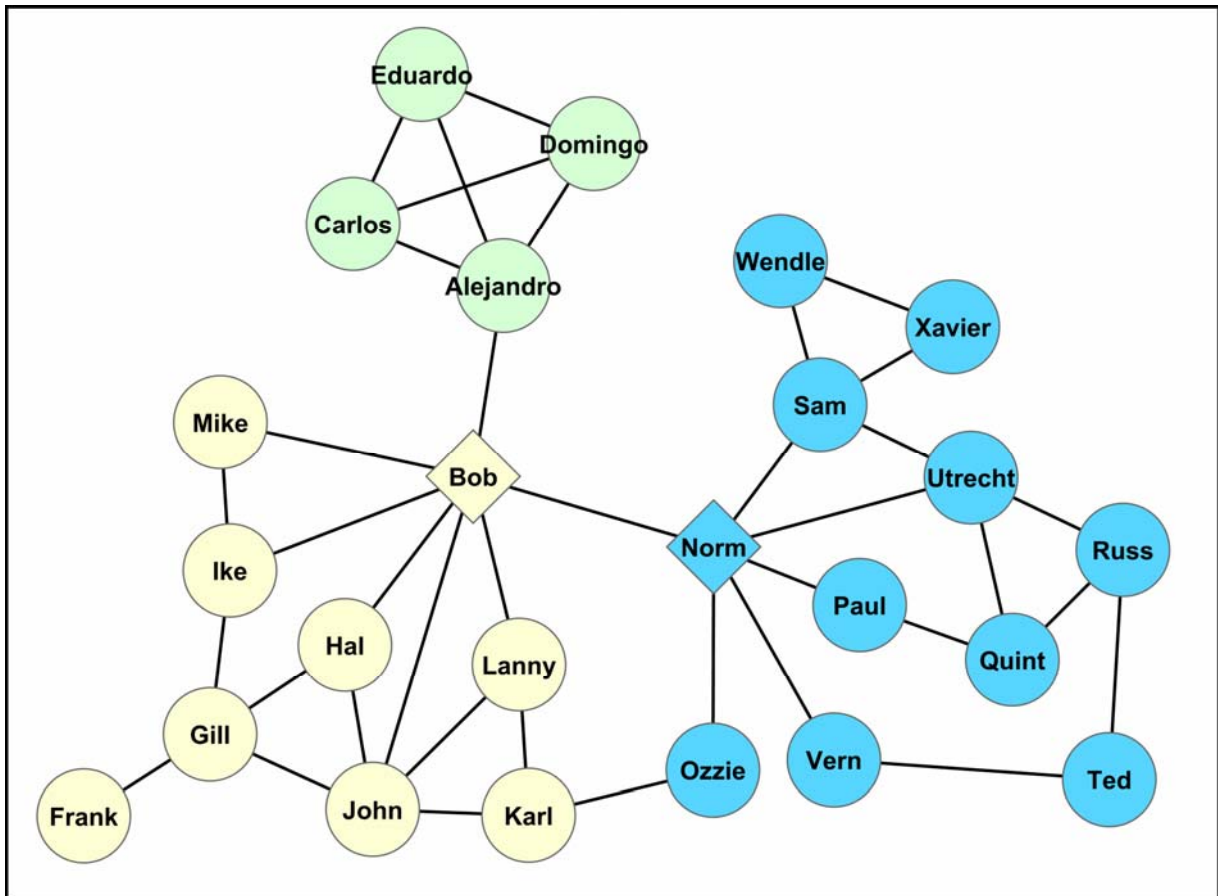

**Supplementary Figure S1.** Michael's strike network [1]. The three worker groups of a former forest product manufacturing factory containing younger, English-speaking (yellow); older, English-speaking (blue); or younger, Spanish-speaking workers (green) were marked. Sam and Wendle (top right) were the union leaders, who failed to break the strike, while Bob and Norm (center, marked with diamonds) were the pair of workers, who successfully broke the strike.

## Supplementary Tables

**Table S1. List of consensus party hubs**

| <b>Consensus party hub</b> |         |
|----------------------------|---------|
| <b>ORFs<sup>a</sup></b>    | YHR077C |
| YAR002W                    | YHR089C |
| YAR003W                    | YHR166C |
| YBL004W                    | YHR200W |
| YBL007C                    | YIL115C |
| YBL038W                    | YJR045C |
| YBL050W                    | YJR065C |
| YBL084C                    | YJR068W |
| YBL099W                    | YJR121W |
| YBR010W                    | YKL018W |
| YBR084W                    | YKL022C |
| YBR087W                    | YKL068W |
| YBR118W                    | YKL085W |
| YBR245C                    | YKL129C |
| YDL029W                    | YLR127C |
| YDL065C                    | YLR212C |
| YDL134C                    | YMR080C |
| YDL208W                    | YMR109W |
| YDL213C                    | YMR116C |
| YDR103W                    | YNL016W |
| YDR118W                    | YNL094W |
| YDR244W                    | YNL102W |
| YDR264C                    | YNL138W |
| YDR395W                    | YNL172W |
| YER157W                    | YNL290W |
| YFR002W                    | YOL094C |
| YFR036W                    | YOR157C |
| YGL004C                    | YOR249C |
| YGL153W                    | YOR250C |
| YGL200C                    | YOR270C |
| YHL030W                    | YPL213W |
| YHR016C                    | YPR088C |

<sup>a</sup>The open reading frame names of 63 consensus yeast party hubs were determined and listed as in [2] comparing the party hubs of the high fidelity yeast protein-protein interaction network [3] with those published in other 5 publications [4-8], and listing only those as ‘consensus party hubs’, which were never classified as a date hub.

**Table S2. List of consensus date hubs**

| <b>Consensus date hub</b> |           |         |         |
|---------------------------|-----------|---------|---------|
| <b>ORFs<sup>a</sup></b>   | YER095W   | YKL081W | YNL093W |
| YAL005C                   | YER110C   | YKL095W | YNL127W |
| YBL016W                   | YER148W   | YKL104C | YNL135C |
| YBL023C                   | YER155C   | YKL166C | YNL243W |
| YBL093C                   | YER165W   | YKL203C | YNL263C |
| YBL105C                   | YFL017W-A | YKR001C | YNL271C |
| YBL106C                   | YFR021W   | YKR026C | YNL298W |
| YBR011C                   | YFR028C   | YKR068C | YOL086C |
| YBR089C-A                 | YFR034C   | YLL021W | YOL090W |
| YBR114W                   | YGL003C   | YLL026W | YOL108C |
| YBR119W                   | YGL092W   | YLL039C | YOL123W |
| YBR126C                   | YGL116W   | YLR044C | YOL133W |
| YBR135W                   | YGL198W   | YLR096W | YOL135C |
| YBR160W                   | YGL207W   | YLR180W | YOR039W |
| YBR175W                   | YGR009C   | YLR229C | YOR089C |
| YBR254C                   | YGR040W   | YLR310C | YOR106W |
| YBR274W                   | YGR086C   | YLR319C | YOR212W |
| YBR279W                   | YGR104C   | YLR337C | YOR244W |
| YCR009C                   | YGR134W   | YLR342W | YOR304W |
| YDL047W                   | YGR218W   | YLR423C | YOR308C |
| YDL101C                   | YGR274C   | YLR452C | YPL004C |
| YDL126C                   | YHR061C   | YML007W | YPL031C |
| YDL160C                   | YHR099W   | YML010W | YPL082C |
| YDL188C                   | YHR152W   | YML064C | YPL129W |
| YDR142C                   | YIL038C   | YML109W | YPL153C |
| YDR155C                   | YIL046W   | YMR001C | YPL161C |
| YDR170C                   | YIL094C   | YMR012W | YPL181W |
| YDR172W                   | YJL081C   | YMR043W | YPL248C |
| YDR192C                   | YJL095W   | YMR054W | YPL256C |
| YDR216W                   | YJL138C   | YMR125W | YPR054W |
| YDR238C                   | YJL141C   | YMR139W | YPR072W |
| YDR240C                   | YJL164C   | YMR199W | YPR086W |
| YDR309C                   | YJL187C   | YMR201C | YPR107C |
| YDR473C                   | YJL194W   | YMR213W | YPR119W |
| YDR523C                   | YJR066W   | YMR273C | YPR182W |
| YEL009C                   | YJR090C   | YMR304W |         |
| YER081W                   | YJR091C   | YNL006W |         |

<sup>a</sup>The open reading frame names of 145 consensus yeast date hubs were determined and listed as in [2] comparing the date hubs of the high fidelity yeast protein-protein interaction network [3] with those published in other 5 publications [4-8], and listing only those as ‘consensus date hubs’, which were never classified as a party hub.

## Description of the NetworGame algorithm

The 2.0 version of the NetworGame program is an updated version of the NetworGame 1.0 version published in a preliminary conference report [9]. NetworGame 2.0 is available in our web-site ([www.linkgroup.hu/NetworGame.php](http://www.linkgroup.hu/NetworGame.php)). The 2.0 version utilizes our experiences gained with the 1.0 version. The NetworGame 2.0 program package is a cross-platform, generic tool to simulate repeated spatial games. This simulation program includes i.) options for pay-off matrices of any symmetric normal form games (with 2 strategies); ii.) several well-known, replicator-type strategy update rules, as well as the option for additional, user-defined strategy update rules in a 'plugin'-type format; iii.) synchronous, and semi-synchronous updating [10]; iv.) and the option for the inclusion of any real world networks in a Pajek format [11].

Here we provide the pseudocode for the algorithm, which describes the flow of the program and the effects of the configuration parameters. A User Guide of version 2.0 can be downloaded from here: [www.linkgroup.hu/NetworGame.php](http://www.linkgroup.hu/NetworGame.php).

### Configurator

- testNode and testEdge are configuration parameters
- printSteps, printStepsStdDev and printLast are configuration parameters
- Nodes and Edges represent the network, where Edges is a set of pairs (src,dst)

```
initialize payoff matrix
if (testNode specified) then
  for i in Nodes do
    initialize strategies
    Si = testNode
    run simulations
    print statistics
  end
else if (testEdge specified) then
  for (src,dst) in Edges do
    initialize strategies
    Ssrc = testEdge
    Sdst = testEdge
    run simulations
    print statistics
  end
else
  initialize strategies
  run simulations
  if (printSteps) then print step-wise average cooperation levels
  if (printStepsStdDev) then print step-wise standard deviances
  if (printLast) then print average cooperation for each node at last step
end
```

## Run simulations

- M is a set of simulations
- L is number of steps
- n is the size of M
- memUsage and elapsedTime are internal variables representing the current memory usage of the system and the elapsed time since the start of the simulations
- maxError is a parameter controlling the statistical accuracy
- numberofsimulations, numberofsteps, mem and time are configuration parameters

```
if (numberofsimulations specified) then
  n = numberofsimulations, i.e. M has size of numberofsimulations
else
  n = 100, i.e. M has size of 100 initially, but it can grow
end

if (numberofsteps specified) then
  L = numberofsteps is the number of steps in each simulation
else
  L = 101 (and it can grow)
end

- run simulations until we reach the specified resource limits, or get below the desired statistical error
while (memUsage < mem and elapsedTime < time) do
  for m in M do
    simulate m up to steps L
  end
  Ai = average cooperation at step i for each m in M
  currMean = average of Ax, where x=L-50 to L
  prevMean = average of Ax, where x=L-150 to L-100
  stddev = standard deviation of Ax, where x=L-50 to L
  meanerror = sqrt(stddev / n*(n-1))
  if (numberofsteps unspecified and abs(prevmean-currmean) > maxError) then
    L = L + 1
  else if (numberofsimulation unspecified and meanerror > maxError/2) then
    add a simulation to M (inherently n = n + 1)
  else
    finish simulations
  end
end

- calculate statistics for printing
for i = 1,2,...,L do
  calculate average cooperation at step i over all m in M
  calculate standard deviation at step i over all m in M
end

for n in Nodes do
  calculate average cooperation at last step for n over all m in M
end
```

## Simulate m up to steps L

- $S_i$  is the current strategy of node  $i$
- $P_i$  is the current payoff of node  $i$
- useWeights,  $x_0$  and  $x_1$  are weight parameters controlling the effect of edge weights
- Neighbors( $i$ ) is the set of neighbors for node  $i$
- Payoff[ $i,j$ ] is the payoff matrix value when strategy  $j$  plays against strategy  $i$
- payoffSchema is a configuration parameter

```
for n = 1,2,...,L do  
  - simulating current round and calculating payoffs  
  for i in Nodes do  
     $P_i = 0$   
    counter = 0  
  - the probability of a game is dependent on the weight parameters and edge weight  $W_{i,j}$   
    for j in Neighbors(i) do  
      if (not useWeights or random(0,1) <= ( $W_{i,j}-x_0$ )/( $x_1-x_0$ )) then  
         $P_i = P_i + \text{Payoff}[S_i, S_j]$   
        counter = counter + 1  
      end  
    if (payoffSchema = degree or payoffSchema = averaging) then  
       $P_i = P_i / \text{counter}$  (if counter > 0)  
    end  
  - updating strategies (strategyUpdateRule can be implemented as a plugin, it may have memory, or might be one of the built-in rules: best takes over or proportional update)  
  for k in Nodes do  
     $S_k = \text{strategyUpdateRule}(\dots)$   
  end  
end
```

## Supplementary References

1. Michael JH (1997) Labor dispute reconciliation in a forest products manufacturing facility. *Forest Products J.* 47: 41–45.
2. Kovács IA, Palotai R, Szalay MS, Csermely P (2010) Community landscapes: a novel, integrative approach for the determination of overlapping network modules. *PLoS ONE* 7: e12528.
3. Ekman D, Light S, Björklund A, Elofsson A (2006) What properties characterize the hub proteins of the protein-protein interaction network of *Saccharomyces cerevisiae*? *Genome Biol.* 7: R45.
4. Han JD, Bertin N, Hao T, Goldberg DS, Berriz GF, et al. (2004) Evidence for dynamically organized modularity in the yeast protein-protein interaction network. *Nature* 430: 88–93.
5. Batada NN, Reguly T, Breitkreutz A, Boucher L, Breitkreutz BJ, et al. (2006) Stratus not altocumulus: a new view of the yeast protein interaction network. *PLoS Biol.* 4: e317.
6. Kim PM, Lu LJ, Xia Y, Gerstein MB (2006) Relating three-dimensional structures to protein networks provides evolutionary insights. *Science* 314: 1938–1941.
7. Komurov K, White M (2007) Revealing static and dynamic modular architecture of the eukaryotic protein interaction network. *Mol. Syst. Biol.* 3: 110.
8. Bertin N, Simonis N, Dupuy D, Cusick ME, Han JD, et al. (2007) Confirmation of organized modularity in the yeast interactome. *PLoS Biol.* 5: e153.
9. Farkas IJ, Korcsmáros T, Kovács IA, Mihalik Á, Palotai R, et al. (2011) Network-based tools in the identification of novel drug-targets. *Science Signaling* 4: pt3.
10. Saif MA, Gade PM (2009) The prisoner's dilemma with semi-synchronous updates: evidence for a first-order phase transition. *J. Stat. Mech. Theor. Exp.* 7: P07023.
11. Batagelj V, Mrvar A (1998) Pajek - Program for large network analysis. *Connections* 21: 47–57.
